# Supplementary material for: Comparison of two methods to assess physical activity prevalence in children: an observational study using a nationally representative sample of Scottish children aged 10–11 years
Source: PubMed Central journal article supplement (PMC5786112; doi:10.1136/bmjopen-2017-018369), 2018-01-24
Supplement: bmjopen-2017-018369supp001.pdf [file bmjopen-2017-018369supp001.pdf]

Supplementary Table 1: Comparison of weighted sample to known national level SES/demographic distributions

| Demographic variable                           | SPACES weighted sample distribution | Sweep 8 Growing up in Scotland (GUS) weighted sample distribution |
|------------------------------------------------|-------------------------------------|-------------------------------------------------------------------|
| Income (per annum)                             |                                     |                                                                   |
| <3,999 - £9,999                                | 3%                                  | 5%                                                                |
| £10,000 - £19,999                              | 20%                                 | 21%                                                               |
| £20,000 - £28,999                              | 18%                                 | 16%                                                               |
| £29,000 - £37,999                              | 14%                                 | 14%                                                               |
| £38,000 - £49,999                              | 14%                                 | 15%                                                               |
| >50,000                                        | 27%                                 | 29%                                                               |
| Mothers age at birth (years)                   |                                     |                                                                   |
| Under 20                                       | 4%                                  | 7%                                                                |
| 20 -29                                         | 43%                                 | 41%                                                               |
| 30 – 39                                        | 50%                                 | 49%                                                               |
| 40 or older                                    | 3%                                  | 3%                                                                |
| Marital status                                 |                                     |                                                                   |
| Married                                        | 61%                                 | 68%                                                               |
| Cohabiting                                     | 19%                                 | 15%                                                               |
| Single                                         | 11%                                 | 9%                                                                |
| Widowed                                        | 1%                                  | 1%                                                                |
| Divorced                                       | 5%                                  | 3%                                                                |
| Separated                                      | 3%                                  | 4%                                                                |
| SIMD quintile (2012)                           |                                     |                                                                   |
| Most                                           | 21%                                 | 20%                                                               |
| 2 <sup>nd</sup>                                | 18%                                 | 21%                                                               |
| Middling                                       | 19%                                 | 20%                                                               |
| 4 <sup>th</sup>                                | 21%                                 | 18%                                                               |
| Least Deprived                                 | 21%                                 | 21%                                                               |
| Highest educational qualification in household |                                     |                                                                   |
| No qualification                               | 3%                                  | 6%                                                                |
| Lower level Standard Grades or equivalent      | 3%                                  | 4%                                                                |
| Upper level Standard Grades or equivalent      | 19%                                 | 19%                                                               |
| Higher Grades or equivalent                    | 39%                                 | 33%                                                               |
| Degree level academic or equivalent            | 35%                                 | 38%                                                               |
| Other                                          | 1%                                  | 0.4%                                                              |
| Urban/Rural dwelling                           |                                     |                                                                   |
| Large urban                                    | 36%                                 | 38%                                                               |
| Other Urban                                    | 33%                                 | 32%                                                               |
| Small accessible towns                         | 9%                                  | 10%                                                               |
| Small remote towns                             | 3%                                  | 3%                                                                |
| Accessible rural                               | 12%                                 | 13%                                                               |
| Remote rural                                   | 7%                                  | 4%                                                                |
| BMI UK categories                              |                                     |                                                                   |
| Underweight                                    | 2%                                  | 2%                                                                |
| Healthy weight                                 | 64%                                 | 64%                                                               |
| Overweight                                     | 18%                                 | 15%                                                               |
| Obese                                          | 16%                                 | 19%                                                               |
